# Supplementary material for: Separating Chinese Character from Noisy Background Using GAN
Source: Hindawi journal article supplement (doi:10.1155/2021/9922017), 2021-01-01
Supplement: f1 [file 9922017.f1.docx]

| Overlapping handwriting & printing | 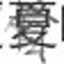 | 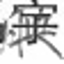 | 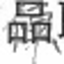 | 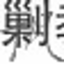 | 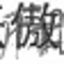 | 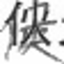 | 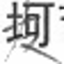 | 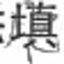 | 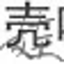 | 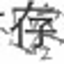 | 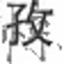 |
| --- | --- | --- | --- | --- | --- | --- | --- | --- | --- | --- | --- |
| ESRGAN | 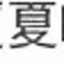 | 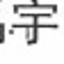 | 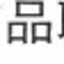 | 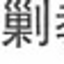 | 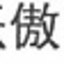 | 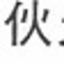 | 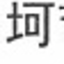 | 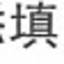 | 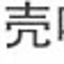 | 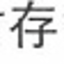 | 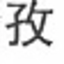 |
| DESRGAN | 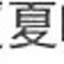 | 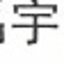 | 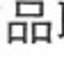 | 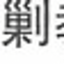 | 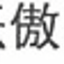 | 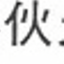 | 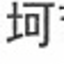 | 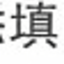 | 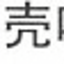 | 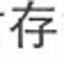 | 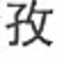 |
| Ground Truth | 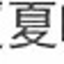 | 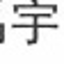 | 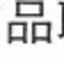 | 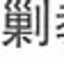 | 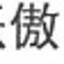 | 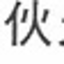 | 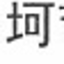 | 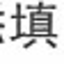 | 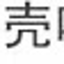 | 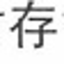 | 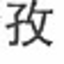 |

Figure S1: Randomly selected printed separation results. Font: Hei.

| Overlapping handwriting & printing | 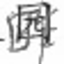 | 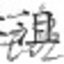 | 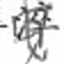 | 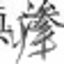 | 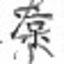 | 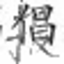 | 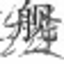 | 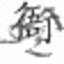 | 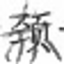 | 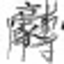 | 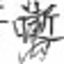 |
| --- | --- | --- | --- | --- | --- | --- | --- | --- | --- | --- | --- |
| ESRGAN | 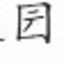 | 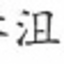 | 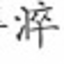 | 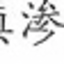 | 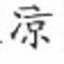 | 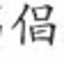 | 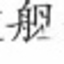 | 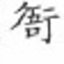 | 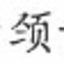 | 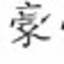 | 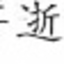 |
| DESRGAN | 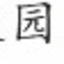 | 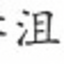 | 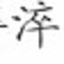 | 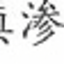 | 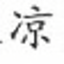 | 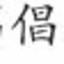 | 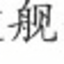 | 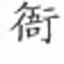 | 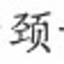 | 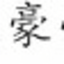 | 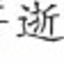 |
| Ground Truth | 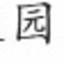 | 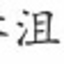 | 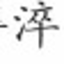 | 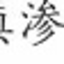 | 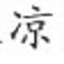 | 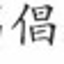 | 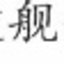 | 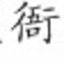 | 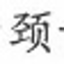 | 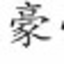 | 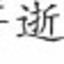 |

Figure S2: Randomly selected printed separation results. Font: Kai.

| Overlapping handwriting & printing | 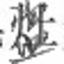 | 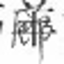 | 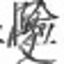 | 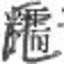 | 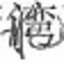 | 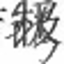 | 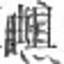 | 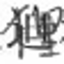 | 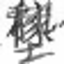 | 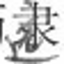 | 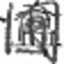 |
| --- | --- | --- | --- | --- | --- | --- | --- | --- | --- | --- | --- |
| ESRGAN | 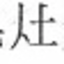 |  |  |  |  |  |  |  |  |  |  |
| DESRGAN |  |  |  |  |  |  |  |  |  |  |  |
| Ground Truth |  |  |  |  |  |  |  |  |  |  |  |

Figure S3: Randomly selected printed separation results. Font: Song.

| Overlapping handwriting & printing |  |  |  |  |  |  |  |  |  |  |  |
| --- | --- | --- | --- | --- | --- | --- | --- | --- | --- | --- | --- |
| ESRGAN |  |  |  |  |  |  |  |  |  |  |  |
| DESRGAN |  |  |  |  |  |  |  |  |  |  |  |
| Ground Truth |  |  |  |  |  |  |  |  |  |  |  |

Figure S4: Randomly selected printed separation results. Font: Imitation Song.

| Overlapping handwriting & printing |  |  |  |  |  |  |  |  |  |  |  |
| --- | --- | --- | --- | --- | --- | --- | --- | --- | --- | --- | --- |
| ESRGAN |  |  |  |  |  |  |  |  |  |  |  |
| DESRGAN |  |  |  |  |  |  |  |  |  |  |  |
| Ground Truth |  |  |  |  |  |  |  |  |  |  |  |

Figure S5: Randomly selected handwritten separation results. Font: Hei.

| Overlapping handwriting & printing |  |  |  |  |  |  |  |  |  |  |  |
| --- | --- | --- | --- | --- | --- | --- | --- | --- | --- | --- | --- |
| ESRGAN |  |  |  |  |  |  |  |  |  |  |  |
| DESRGAN |  |  |  |  |  |  |  |  |  |  |  |
| Ground Truth |  |  |  |  |  |  |  |  |  |  |  |

Figure S6: Randomly selected handwritten separation results. Font: Kai.

| Overlapping handwriting & printing |  |  |  |  |  |  |  |  |  |  |  |
| --- | --- | --- | --- | --- | --- | --- | --- | --- | --- | --- | --- |
| ESRGAN |  |  |  |  |  |  |  |  |  |  |  |
| DESRGAN |  |  |  |  |  |  |  |  |  |  |  |
| Ground Truth |  |  |  |  |  |  |  |  |  |  |  |

Figure S7: Randomly selected handwritten separation results. Font: Song.

| Overlapping handwriting & printing |  |  |  |  |  |  |  |  |  |  |  |
| --- | --- | --- | --- | --- | --- | --- | --- | --- | --- | --- | --- |
| ESRGAN |  |  |  |  |  |  |  |  |  |  |  |
| DESRGAN |  |  |  |  |  |  |  |  |  |  |  |
| Ground Truth |  |  |  |  |  |  |  |  |  |  |  |

Figure S8: Randomly selected handwritten separation results. Font: Imitation Song.
